# Supplementary material for: Efficacy of Carbon Nanodots and Manganese Ferrite (MnFe2O4) Nanoparticles in Stimulating Growth and Antioxidant Activity in Drought-Stressed Maize Inbred Lines
Source: MDPI journal article supplement (doi:10.3390/plants12162922), 2023-08-11
Supplement: s1 [file s1]

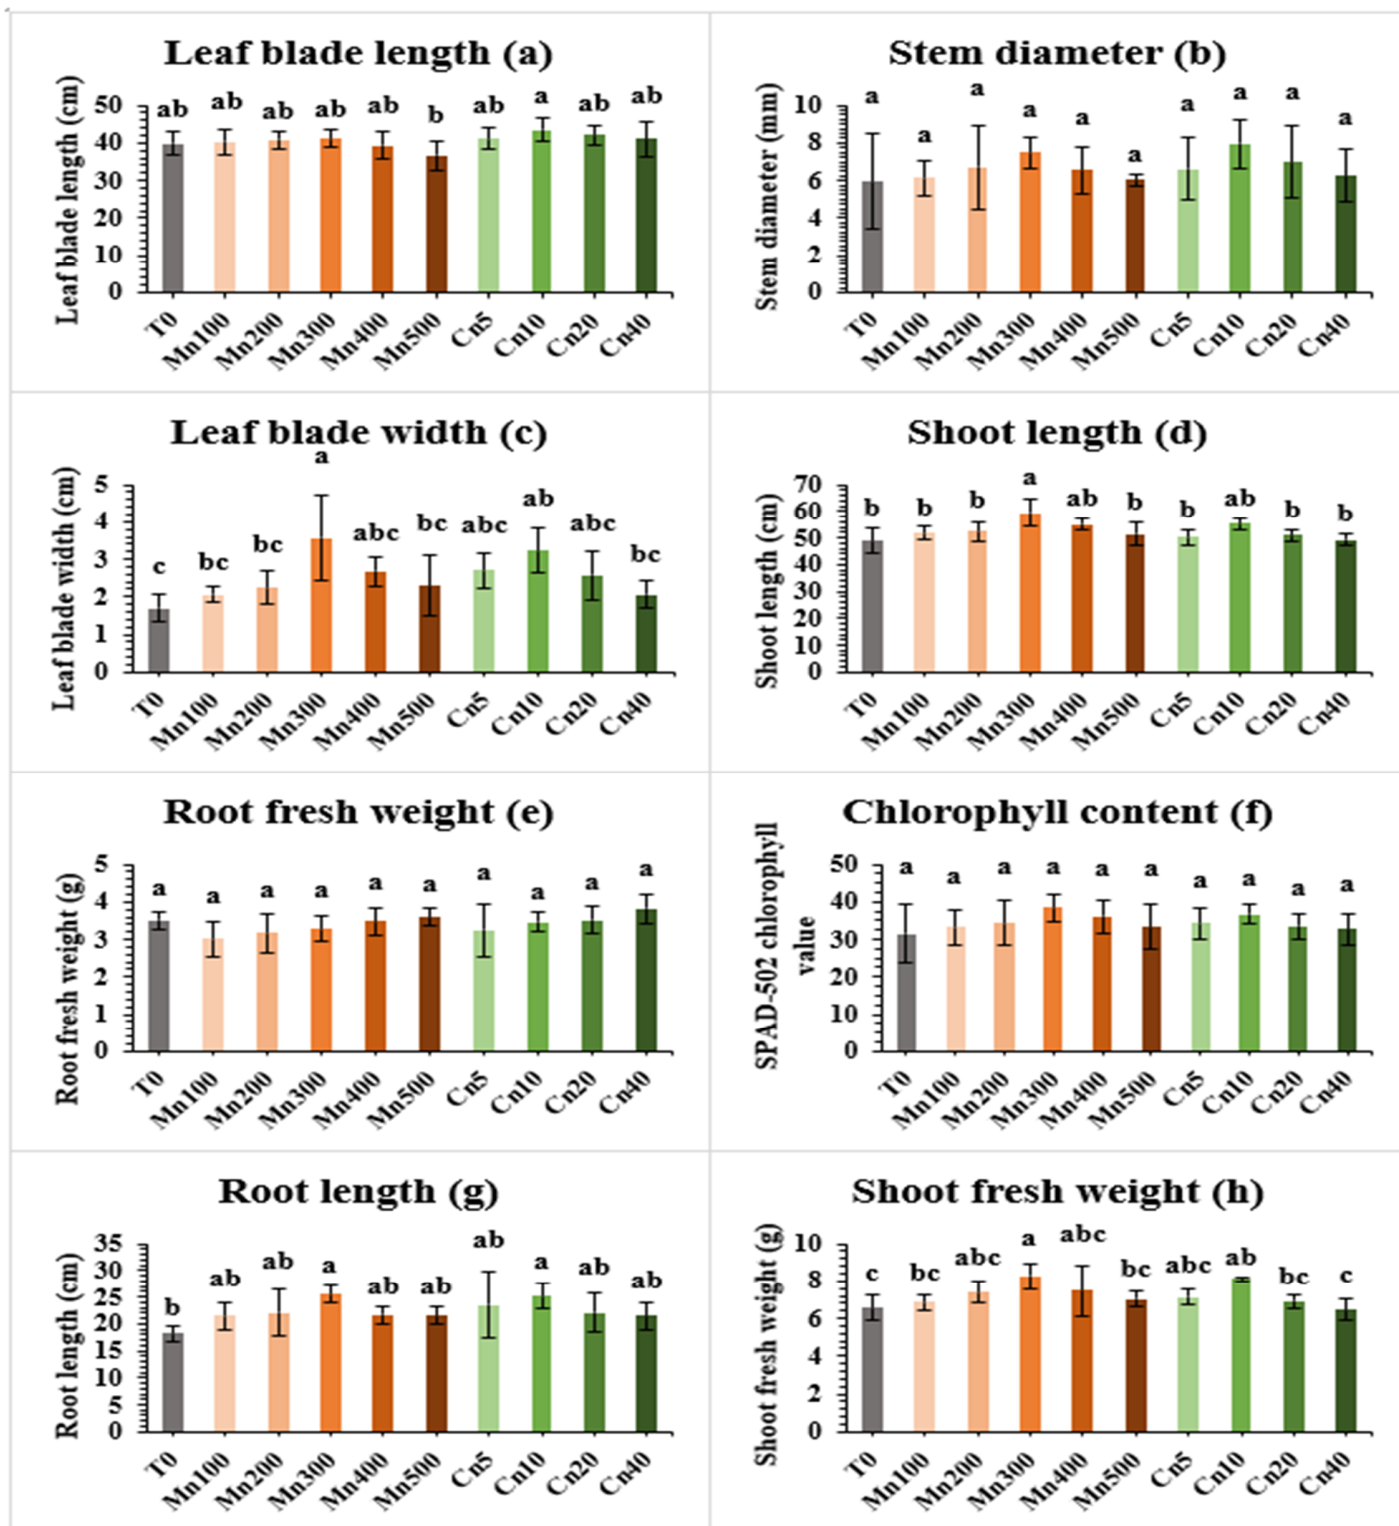

**Figure S1.** Effects of carbon nanodots (CND) and manganese iron oxide ( $\text{MnFe}_2\text{O}_4$ ) on leaf blade length (a), stem diameter (b), leaf blade length (c), shoot length (d), root fresh weight (e), chlorophyll content (f), root length (g), and shoot length (h) of drought stressed HW3 maize inbred line. T0: control treatment; Mn100, Mn200, Mn300, Mn400, and Mn500: foliar application of  $100 \text{ mg L}^{-1}$   $\text{MnFe}_2\text{O}_4$  NP,  $200 \text{ mg L}^{-1}$   $\text{MnFe}_2\text{O}_4$  NP,  $300 \text{ mg L}^{-1}$   $\text{MnFe}_2\text{O}_4$  NP,  $400 \text{ mg L}^{-1}$   $\text{MnFe}_2\text{O}_4$  NP and  $500 \text{ mg L}^{-1}$   $\text{MnFe}_2\text{O}_4$  NP, respectively; Cn5, Cn10, Cn20, Cn40: foliar application of  $5 \text{ mg L}^{-1}$ ,  $10 \text{ mg L}^{-1}$ ,  $20 \text{ mg L}^{-1}$ ,  $40 \text{ mg L}^{-1}$  CND, respectively. The results are presented as a means  $\pm$  standard deviation ( $n = 3$ ). Different lowercase letters indicate significant differences among different treatments at  $p \leq 0.05$ .

**Table S1.** Effects of CND and MnFe<sub>2</sub>O<sub>4</sub> NP on concentrations of different phenolic acids of 41 maize inbred lines under drought stress

| Maize accessions | Treatments                       | Phenolic compounds (µg/ml) |                  |              |               |                 |              |
|------------------|----------------------------------|----------------------------|------------------|--------------|---------------|-----------------|--------------|
|                  |                                  | Gallic acid                | Chlorogenic acid | Caffeic acid | Syringic acid | p-coumaric acid | Ferulic acid |
| 11BS8 016-7      | MnFe <sub>2</sub> O <sub>4</sub> | 2.12 ± 0.02c               | 1.43 ± 0.03b     | 1.58 ± 0.02b | 0.00 ± 0.00c  | 1.71 ± 0.02c    | 0.95 ± 0.01c |
|                  | Control                          | 3.36 ± 0.03a               | 2.21 ± 0.02a     | 0.00 ± 0.00c | 0.45 ± 0.00b  | 2.80 ± 0.00b    | 1.62 ± 0.02a |
|                  | Cn dots                          | 2.91 ± 0.00b               | 0.00 ± 0.00c     | 2.40 ± 0.02a | 0.50 ± 0.00a  | 2.92 ± 0.02a    | 1.01 ± 0.00b |
| 12BS5 076-8      | MnFe <sub>2</sub> O <sub>4</sub> | 2.32 ± 0.03a               | 0.00 ± 0.00b     | 1.78 ± 0.01a | 0.45 ± 0.00a  | 1.17 ± 0.01b    | 0.74 ± 0.02a |
|                  | Control                          | 2.18 ± 0.03c               | 0.00 ± 0.00b     | 1.37 ± 0.01c | 0.45 ± 0.00b  | 1.05 ± 0.01c    | 0.00 ± 0.00b |
|                  | Cn dots                          | 2.24 ± 0.01b               | 5.15 ± 0.03a     | 1.51 ± 0.01b | 0.00 ± 0.00c  | 1.29 ± 0.02a    | 0.00 ± 0.00b |
| 12S80 52         | MnFe <sub>2</sub> O <sub>4</sub> | 1.66 ± 0.03c               | 0.00 ± 0.00c     | 1.48 ± 0.05c | 0.00 ± 0.00c  | 0.95 ± 0.01c    | 1.25 ± 0.02b |
|                  | Control                          | 2.93 ± 0.02b               | 1.23 ± 0.01b     | 2.13 ± 0.02a | 0.93 ± 0.02a  | 1.54 ± 0.02a    | 1.47 ± 0.01c |
|                  | Cn dots                          | 3.48 ± 0.02a               | 5.18 ± 0.03a     | 1.64 ± 0.02b | 0.46 ± 0.00b  | 1.33 ± 0.01b    | 0.84 ± 0.01a |
| 14S80 25         | MnFe <sub>2</sub> O <sub>4</sub> | 1.35 ± 0.00c               | 0.00 ± 0.00c     | 1.39 ± 0.02b | 0.51 ± 0.00c  | 0.79 ± 0.01c    | 0.89 ± 0.04c |
|                  | Control                          | 4.67 ± 0.02a               | 1.41 ± 0.01b     | 1.16 ± 0.01c | 0.77 ± 0.00a  | 1.52 ± 0.01a    | 1.46 ± 0.02a |
|                  | Cn dots                          | 3.10 ± 0.01b               | 2.92 ± 0.02a     | 1.98 ± 0.03a | 0.60 ± 0.02b  | 1.25 ± 0.02b    | 0.99 ± 0.01b |
| 15RS8 039        | MnFe <sub>2</sub> O <sub>4</sub> | 1.55 ± 0.00c               | 0.00 ± 0.00c     | 1.22 ± 0.01c | 0.00 ± 0.00c  | 0.78 ± 0.01c    | 0.65 ± 0.00b |
|                  | Control                          | 2.47 ± 0.01b               | 1.39 ± 0.03b     | 1.94 ± 0.02b | 0.46 ± 0.00b  | 0.95 ± 0.00b    | 1.13 ± 0.04a |
|                  | Cn dots                          | 2.77 ± 0.02a               | 2.65 ± 0.01a     | 2.02 ± 0.01a | 0.60 ± 0.01a  | 1.13 ± 0.02a    | 1.10 ± 0.00a |
| 15RS8 056        | MnFe <sub>2</sub> O <sub>4</sub> | 3.00 ± 0.08c               | 0.00 ± 0.00c     | 1.11 ± 0.01c | 0.00 ± 0.00b  | 1.55 ± 0.01b    | 1.33 ± 0.01b |
|                  | Control                          | 3.19 ± 0.03b               | 2.36 ± 0.04b     | 1.33 ± 0.00b | 0.00 ± 0.00b  | 2.03 ± 0.01a    | 1.38 ± 0.01a |
|                  | Cn dots                          | 3.66 ± 0.02a               | 4.32 ± 0.03a     | 2.18 ± 0.01a | 0.50 ± 0.00a  | 1.10 ± 0.01c    | 1.01 ± 0.01c |
| 15RS8 002        | MnFe <sub>2</sub> O <sub>4</sub> | 2.16 ± 0.00b               | 0.00 ± 0.00c     | 0.77 ± 0.01c | 0.00 ± 0.00b  | 1.11 ± 0.01b    | 1.02 ± 0.00b |
|                  | Control                          | 2.35 ± 0.02a               | 2.17 ± 0.03a     | 0.96 ± 0.01b | 0.00 ± 0.00b  | 1.38 ± 0.01a    | 0.00 ± 0.00c |
|                  | Cn dots                          | 1.97 ± 0.03c               | 2.06 ± 0.02b     | 1.71 ± 0.01a | 0.67 ± 0.01a  | 1.37 ± 0.00a    | 1.35 ± 0.01a |
| 15S80 21-3       | MnFe <sub>2</sub> O <sub>4</sub> | 1.11 ± 0.01c               | 0.00 ± 0.00c     | 1.81 ± 0.03c | 0.47 ± 0.01c  | 0.93 ± 0.01c    | 0.97 ± 0.02b |
|                  | Control                          | 4.25 ± 0.07a               | 4.42 ± 0.07a     | 2.79 ± 0.03a | 0.90 ± 0.02b  | 2.13 ± 0.02a    | 1.51 ± 0.02a |
|                  | Cn dots                          | 2.69 ± 0.03b               | 4.07 ± 0.10b     | 2.01 ± 0.02b | 0.94 ± 0.00a  | 1.83 ± 0.02b    | 1.48 ± 0.01a |
| 16CLP 23         | MnFe <sub>2</sub> O <sub>4</sub> | 2.94 ± 0.02c               | 0.00 ± 0.00c     | 1.88 ± 0.01b | 0.00 ± 0.00c  | 1.56 ± 0.01b    | 1.24 ± 0.01b |
|                  | Control                          | 4.95 ± 0.02a               | 1.91 ± 0.03b     | 2.92 ± 0.03a | 0.56 ± 0.00b  | 1.69 ± 0.01a    | 1.48 ± 0.02a |
|                  | Cn dots                          | 3.39 ± 0.01b               | 5.53 ± 0.04a     | 1.55 ± 0.00c | 0.59 ± 0.00a  | 1.36 ± 0.01c    | 1.23 ± 0.01b |
| 16CLP 40         | MnFe <sub>2</sub> O <sub>4</sub> | 3.29 ± 0.07c               | 0.00 ± 0.00c     | 1.11 ± 0.01b | 0.00 ± 0.00b  | 1.60 ± 0.01c    | 1.24 ± 0.02c |
|                  | Control                          | 4.73 ± 0.05a               | 3.01 ± 0.01b     | 2.46 ± 0.48a | 0.00 ± 0.00b  | 2.64 ± 0.01a    | 1.42 ± 0.03a |
|                  | Cn dots                          | 3.74 ± 0.01b               | 4.50 ± 0.00a     | 2.07 ± 0.01a | 0.56 ± 0.01a  | 2.33 ± 0.00b    | 1.30 ± 0.00b |
| 17CS5 047        | MnFe <sub>2</sub> O <sub>4</sub> | 3.56 ± 0.03b               | 0.00 ± 0.00c     | 1.03 ± 0.02c | 0.00 ± 0.00c  | 1.46 ± 0.00b    | 1.05 ± 0.02c |
|                  | Control                          | 4.02 ± 0.07a               | 0.87 ± 0.00b     | 1.47 ± 0.02b | 0.57 ± 0.00b  | 1.86 ± 0.02a    | 1.28 ± 0.01a |
|                  | Cn dots                          | 2.21 ± 0.02c               | 5.26 ± 0.04a     | 1.70 ± 0.02a | 0.77 ± 0.02a  | 1.24 ± 0.00c    | 1.12 ± 0.00b |
| 16S80 68-9       | MnFe <sub>2</sub> O <sub>4</sub> | 2.25 ± 0.00c               | 0.97 ± 0.01c     | 1.48 ± 0.01c | 0.48 ± 0.00c  | 0.87 ± 0.00c    | 0.89 ± 0.01c |
|                  | Control                          | 4.82 ± 0.01a               | 3.17 ± 0.03a     | 1.60 ± 0.04b | 0.56 ± 0.01b  | 1.76 ± 0.01a    | 1.23 ± 0.03a |
|                  | Cn dots                          | 2.28 ± 0.00b               | 2.25 ± 0.01b     | 2.36 ± 0.01a | 1.04 ± 0.00a  | 1.08 ± 0.00b    | 1.13 ± 0.01b |
| 17CS8 006        | MnFe <sub>2</sub> O <sub>4</sub> | 1.31 ± 0.02c               | 0.00 ± 0.00c     | 1.56 ± 0.02a | 0.50 ± 0.00b  | 0.84 ± 0.01c    | 1.01 ± 0.03a |
|                  | Control                          | 5.41 ± 0.04a               | 3.00 ± 0.05a     | 0.92 ± 0.02c | 0.51 ± 0.00a  | 1.89 ± 0.01a    | 0.98 ± 0.02a |
|                  | Cn dots                          | 2.74 ± 0.01b               | 1.73 ± 0.02b     | 1.13 ± 0.00b | 0.00 ± 0.00c  | 1.85 ± 0.01b    | 0.88 ± 0.00b |
|                  | MnFe <sub>2</sub> O <sub>4</sub> | 2.30 ± 0.01c               | 1.78 ± 0.37a     | 0.84 ± 0.01b | 0.56 ± 0.01b  | 1.23 ± 0.02c    | 0.89 ± 0.01b |

|       |                                  |              |              |              |              |              |              |
|-------|----------------------------------|--------------|--------------|--------------|--------------|--------------|--------------|
| 17CS8 | Control                          | 2.45 ± 0.07b | 1.18 ± 0.00b | 0.64 ± 0.01c | 0.00 ± 0.00c | 1.28 ± 0.00b | 0.64 ± 0.00c |
| 067   | Cn dots                          | 3.25 ± 0.03a | 1.90 ± 0.01a | 2.13 ± 0.01a | 0.59 ± 0.00a | 2.01 ± 0.01a | 1.41 ± 0.01a |
| 17YS6 | MnFe <sub>2</sub> O <sub>4</sub> | 1.30 ± 0.01c | 1.05 ± 0.02c | 1.04 ± 0.00b | 0.50 ± 0.00a | 1.03 ± 0.01c | 0.93 ± 0.04b |
| 032   | Control                          | 3.25 ± 0.04a | 3.28 ± 0.03b | 0.83 ± 0.01c | 0.51 ± 0.00a | 1.58 ± 0.01a | 1.02 ± 0.02a |
|       | Cn dots                          | 2.71 ± 0.00b | 4.13 ± 0.02a | 1.89 ± 0.02a | 0.31 ± 0.53a | 1.29 ± 0.00b | 1.06 ± 0.01a |
| 17YS8 | MnFe <sub>2</sub> O <sub>4</sub> | 2.92 ± 0.01b | 2.07 ± 0.01a | 1.74 ± 0.01a | 0.50 ± 0.00a | 0.99 ± 0.01b | 1.06 ± 0.01a |
| 003   | Control                          | 3.53 ± 0.02a | 1.23 ± 0.02c | 1.15 ± 0.01b | 0.48 ± 0.01b | 1.69 ± 0.02a | 1.01 ± 0.01b |
|       | Cn dots                          | 1.02 ± 0.00c | 1.46 ± 0.01b | 0.62 ± 0.01c | 0.00 ± 0.00c | 0.73 ± 0.00c | 0.00 ± 0.00c |
| GP3   | MnFe <sub>2</sub> O <sub>4</sub> | 2.48 ± 0.01b | 1.42 ± 0.01c | 0.85 ± 0.00c | 0.48 ± 0.00c | 1.06 ± 0.01c | 0.77 ± 0.01c |
|       | Control                          | 2.06 ± 0.02c | 4.13 ± 0.04a | 1.30 ± 0.03b | 0.78 ± 0.01a | 1.32 ± 0.01b | 1.20 ± 0.01a |
|       | Cn dots                          | 3.92 ± 0.04a | 2.04 ± 0.02b | 2.14 ± 0.01a | 0.58 ± 0.00b | 1.58 ± 0.00a | 1.08 ± 0.00b |
| GP5   | MnFe <sub>2</sub> O <sub>4</sub> | 2.10 ± 0.01c | 1.26 ± 0.02c | 1.01 ± 0.00c | 0.00 ± 0.00c | 1.92 ± 0.01c | 0.94 ± 0.02b |
|       | Control                          | 3.16 ± 0.01a | 3.79 ± 0.05a | 1.62 ± 0.03b | 0.61 ± 0.01b | 2.49 ± 0.00a | 1.28 ± 0.03a |
|       | Cn dots                          | 2.97 ± 0.05b | 3.03 ± 0.04b | 1.90 ± 0.02a | 0.96 ± 0.01a | 2.03 ± 0.01b | 1.26 ± 0.02a |
| HCW1  | MnFe <sub>2</sub> O <sub>4</sub> | 2.30 ± 0.02c | 1.77 ± 0.02c | 0.80 ± 0.00b | 0.00 ± 0.00c | 1.48 ± 0.01c | 0.93 ± 0.02c |
|       | Control                          | 3.95 ± 0.03a | 2.63 ± 0.01a | 0.69 ± 0.01c | 0.48 ± 0.00b | 1.65 ± 0.00b | 1.11 ± 0.02b |
|       | Cn dots                          | 3.38 ± 0.01b | 2.41 ± 0.01b | 2.91 ± 0.07a | 0.75 ± 0.00a | 1.67 ± 0.00a | 1.46 ± 0.01a |
| HCW2  | MnFe <sub>2</sub> O <sub>4</sub> | 2.31 ± 0.06c | 2.89 ± 0.02a | 1.13 ± 0.01b | 0.00 ± 0.00c | 1.30 ± 0.01c | 1.16 ± 0.01c |
|       | Control                          | 5.01 ± 0.08a | 1.40 ± 0.02b | 1.16 ± 0.03b | 0.52 ± 0.00b | 2.33 ± 0.01a | 1.83 ± 0.03a |
|       | Cn dots                          | 3.48 ± 0.04b | 0.00 ± 0.00c | 3.01 ± 0.48a | 0.59 ± 0.00a | 1.57 ± 0.00b | 1.52 ± 0.02b |
| HCW3  | MnFe <sub>2</sub> O <sub>4</sub> | 2.21 ± 0.00c | 1.18 ± 0.02c | 0.64 ± 0.00c | 0.51 ± 0.00c | 1.18 ± 0.01c | 1.13 ± 0.01c |
|       | Control                          | 3.67 ± 0.02a | 4.50 ± 0.10a | 1.10 ± 0.01b | 0.66 ± 0.01a | 2.26 ± 0.02b | 1.39 ± 0.02b |
|       | Cn dots                          | 3.58 ± 0.01b | 2.22 ± 0.02b | 2.07 ± 0.02a | 0.57 ± 0.01b | 2.35 ± 0.02a | 1.64 ± 0.03a |
| HCW4  | MnFe <sub>2</sub> O <sub>4</sub> | 0.97 ± 0.01c | 0.00 ± 0.00c | 0.00 ± 0.00c | 0.64 ± 0.00a | 0.91 ± 0.00c | 0.70 ± 0.01c |
|       | Control                          | 4.84 ± 0.03a | 1.94 ± 0.01b | 0.77 ± 0.01b | 0.46 ± 0.00b | 1.93 ± 0.01a | 0.74 ± 0.00b |
|       | Cn dots                          | 2.10 ± 0.02b | 4.57 ± 0.06a | 1.87 ± 0.03a | 0.00 ± 0.00c | 1.32 ± 0.01b | 0.89 ± 0.00a |
| HCW5  | MnFe <sub>2</sub> O <sub>4</sub> | 2.08 ± 0.02c | 1.02 ± 0.02c | 0.76 ± 0.02a | 0.48 ± 0.01c | 1.11 ± 0.01c | 0.96 ± 0.02c |
|       | Control                          | 3.56 ± 0.02a | 3.03 ± 0.08b | 1.02 ± 0.03a | 0.54 ± 0.00b | 1.69 ± 0.01a | 1.14 ± 0.00b |
|       | Cn dots                          | 2.58 ± 0.02b | 6.10 ± 0.02a | 1.49 ± 1.29a | 0.81 ± 0.01a | 1.64 ± 0.01b | 1.46 ± 0.01a |
| HF12  | MnFe <sub>2</sub> O <sub>4</sub> | 2.31 ± 0.05b | 0.95 ± 0.01b | 0.77 ± 0.01b | 0.55 ± 0.01b | 1.36 ± 0.01b | 1.13 ± 0.01a |
|       | Control                          | 3.55 ± 0.02a | 0.86 ± 0.02b | 0.68 ± 0.01c | 0.51 ± 0.01c | 1.92 ± 0.02a | 0.75 ± 0.00c |
|       | Cn dots                          | 2.25 ± 0.03b | 6.34 ± 0.11a | 1.88 ± 0.02a | 0.66 ± 0.01a | 1.37 ± 0.01b | 1.03 ± 0.01b |
| HF22  | MnFe <sub>2</sub> O <sub>4</sub> | 2.11 ± 0.02c | 3.13 ± 0.01a | 0.73 ± 0.01c | 0.55 ± 0.00b | 1.24 ± 0.00c | 1.12 ± 0.03b |
|       | Control                          | 3.11 ± 0.02b | 1.57 ± 0.02c | 0.92 ± 0.01b | 0.52 ± 0.00c | 2.32 ± 0.01a | 1.11 ± 0.02b |
|       | Cn dots                          | 3.47 ± 0.02a | 2.54 ± 0.01b | 2.62 ± 0.02a | 0.87 ± 0.01a | 1.87 ± 0.00b | 1.33 ± 0.00a |
| HW1   | MnFe <sub>2</sub> O <sub>4</sub> | 3.03 ± 0.03c | 1.78 ± 0.03b | 1.20 ± 0.04b | 0.00 ± 0.00c | 1.63 ± 0.03b | 1.24 ± 0.01b |
|       | Control                          | 5.10 ± 0.07a | 1.54 ± 0.01c | 0.74 ± 0.00c | 0.48 ± 0.00a | 2.46 ± 0.04a | 1.39 ± 0.01a |
|       | Cn dots                          | 3.38 ± 0.03b | 2.01 ± 0.01a | 1.70 ± 0.03a | 0.45 ± 0.00b | 1.28 ± 0.00c | 1.08 ± 0.01c |
| HW10  | MnFe <sub>2</sub> O <sub>4</sub> | 2.51 ± 0.04b | 0.00 ± 0.00b | 1.00 ± 0.01c | 0.51 ± 0.00b | 1.19 ± 0.01c | 1.18 ± 0.01c |
|       | Control                          | 3.94 ± 0.03a | 0.00 ± 0.00b | 1.09 ± 0.01b | 0.54 ± 0.01a | 3.14 ± 0.03a | 1.43 ± 0.01a |
|       | Cn dots                          | 2.41 ± 0.02c | 2.58 ± 0.03a | 2.06 ± 0.00a | 0.50 ± 0.00b | 1.38 ± 0.00b | 1.27 ± 0.02b |
| HW11  | MnFe <sub>2</sub> O <sub>4</sub> | 1.90 ± 0.03c | 1.03 ± 0.04b | 1.14 ± 0.01c | 0.50 ± 0.00a | 1.35 ± 0.01c | 1.11 ± 0.01a |
|       | Control                          | 3.70 ± 0.02a | 0.99 ± 0.01b | 1.53 ± 0.03b | 0.00 ± 0.00b | 2.92 ± 0.01a | 0.70 ± 0.01c |
|       | Cn dots                          | 3.63 ± 0.04b | 2.02 ± 0.03a | 2.19 ± 0.01a | 0.00 ± 0.00b | 1.96 ± 0.00b | 1.05 ± 0.00b |
| HW12  | MnFe <sub>2</sub> O <sub>4</sub> | 1.99 ± 0.01c | 1.44 ± 0.03c | 0.64 ± 0.00c | 0.50 ± 0.00a | 0.87 ± 0.01b | 1.25 ± 0.02a |

|       |                                  |              |              |              |              |              |              |
|-------|----------------------------------|--------------|--------------|--------------|--------------|--------------|--------------|
| HW15  | Control                          | 4.24 ± 0.05a | 2.22 ± 0.06a | 1.01 ± 0.01b | 0.49 ± 0.00b | 2.14 ± 0.02a | 1.07 ± 0.05c |
|       | Cn dots                          | 3.90 ± 0.03b | 2.08 ± 0.01b | 1.39 ± 0.00a | 0.00 ± 0.00c | 2.13 ± 0.02a | 1.15 ± 0.00b |
|       | MnFe <sub>2</sub> O <sub>4</sub> | 1.00 ± 0.01c | 0.00 ± 0.00b | 1.40 ± 0.06b | 0.52 ± 0.00a | 1.00 ± 0.03c | 0.00 ± 0.00b |
| HW16  | Control                          | 3.78 ± 0.03a | 0.00 ± 0.00b | 0.76 ± 0.00c | 0.49 ± 0.00b | 1.53 ± 0.00a | 0.78 ± 0.03a |
|       | Cn dots                          | 2.94 ± 0.05b | 2.77 ± 0.01a | 2.17 ± 0.09a | 0.49 ± 0.01b | 1.28 ± 0.00b | 0.84 ± 0.08a |
|       | MnFe <sub>2</sub> O <sub>4</sub> | 1.92 ± 0.04c | 1.08 ± 0.08c | 1.96 ± 0.05a | 0.71 ± 0.03a | 1.08 ± 0.01c | 0.72 ± 0.01c |
| HW17  | Control                          | 2.88 ± 0.03a | 1.67 ± 0.03b | 0.96 ± 0.04c | 0.00 ± 0.00b | 1.53 ± 0.01b | 0.89 ± 0.03b |
|       | Cn dots                          | 2.00 ± 0.02b | 2.41 ± 0.06a | 1.47 ± 0.00b | 0.00 ± 0.00b | 1.67 ± 0.01a | 0.94 ± 0.01a |
|       | MnFe <sub>2</sub> O <sub>4</sub> | 2.55 ± 0.01c | 0.97 ± 0.02c | 2.02 ± 0.09a | 0.45 ± 0.00c | 1.35 ± 0.02c | 1.18 ± 0.02b |
| HW18  | Control                          | 3.09 ± 0.07b | 1.43 ± 0.02b | 1.62 ± 0.01c | 0.52 ± 0.02a | 1.45 ± 0.01b | 1.16 ± 0.02b |
|       | Cn dots                          | 3.53 ± 0.03a | 5.53 ± 0.07a | 1.82 ± 0.00b | 0.49 ± 0.00b | 2.01 ± 0.01a | 1.24 ± 0.00a |
|       | MnFe <sub>2</sub> O <sub>4</sub> | 2.33 ± 0.00b | 0.92 ± 0.02c | 0.70 ± 0.00c | 0.51 ± 0.01a | 0.98 ± 0.01c | 0.93 ± 0.01a |
| HW19  | Control                          | 2.46 ± 0.03a | 2.80 ± 0.06b | 1.05 ± 0.01b | 0.00 ± 0.00b | 1.11 ± 0.01b | 0.00 ± 0.00c |
|       | Cn dots                          | 1.87 ± 0.01c | 4.13 ± 0.03a | 1.17 ± 0.01a | 0.00 ± 0.00b | 1.27 ± 0.01a | 0.77 ± 0.01b |
|       | MnFe <sub>2</sub> O <sub>4</sub> | 2.41 ± 0.02b | 1.21 ± 0.01c | 1.17 ± 0.01b | 0.53 ± 0.00a | 1.33 ± 0.01b | 1.20 ± 0.01a |
| HW3   | Control                          | 2.78 ± 0.03a | 5.13 ± 0.03a | 1.18 ± 0.00a | 0.49 ± 0.01b | 1.40 ± 0.02a | 1.02 ± 0.00b |
|       | Cn dots                          | 1.86 ± 0.05c | 4.02 ± 0.01b | 1.19 ± 0.01a | 0.45 ± 0.00c | 1.13 ± 0.00c | 0.80 ± 0.00c |
|       | MnFe <sub>2</sub> O <sub>4</sub> | 1.84 ± 0.01c | 1.12 ± 0.03b | 0.95 ± 0.02c | 0.49 ± 0.00b | 1.05 ± 0.00c | 1.14 ± 0.02a |
| HW4   | Control                          | 3.73 ± 0.06b | 1.24 ± 1.08b | 1.65 ± 0.01a | 0.53 ± 0.00a | 2.40 ± 0.04b | 1.07 ± 0.01b |
|       | Cn dots                          | 4.38 ± 0.01a | 4.57 ± 0.05a | 1.38 ± 0.03b | 0.48 ± 0.00c | 2.52 ± 0.02a | 0.80 ± 0.00c |
|       | MnFe <sub>2</sub> O <sub>4</sub> | 1.68 ± 0.01c | 0.00 ± 0.00c | 0.00 ± 0.00c | 0.66 ± 0.01b | 1.13 ± 0.01c | 1.09 ± 0.01c |
| HW7   | Control                          | 3.33 ± 0.06b | 2.28 ± 0.09b | 1.92 ± 0.03a | 0.69 ± 0.01a | 1.64 ± 0.01b | 1.24 ± 0.00b |
|       | Cn dots                          | 3.54 ± 0.02a | 3.85 ± 0.05a | 1.32 ± 0.00b | 0.47 ± 0.00c | 2.45 ± 0.01a | 1.69 ± 0.01a |
|       | MnFe <sub>2</sub> O <sub>4</sub> | 1.99 ± 0.01c | 0.00 ± 0.00b | 0.00 ± 0.00c | 0.72 ± 0.00a | 1.12 ± 0.01b | 0.86 ± 0.00c |
| HW8   | Control                          | 4.18 ± 0.02a | 0.00 ± 0.00b | 1.87 ± 0.02b | 0.48 ± 0.00b | 1.83 ± 0.01a | 1.80 ± 0.01a |
|       | Cn dots                          | 3.71 ± 0.01b | 8.71 ± 0.02a | 2.68 ± 0.02a | 0.00 ± 0.00c | 0.87 ± 0.00c | 1.48 ± 0.00b |
|       | MnFe <sub>2</sub> O <sub>4</sub> | 2.21 ± 0.01c | 1.09 ± 0.03c | 1.25 ± 0.02b | 0.48 ± 0.00a | 0.91 ± 0.02c | 1.27 ± 0.01a |
| HW9   | Control                          | 3.34 ± 0.09b | 1.55 ± 0.00b | 1.00 ± 0.01c | 0.00 ± 0.00b | 1.79 ± 0.01b | 0.80 ± 0.00c |
|       | Cn dots                          | 4.67 ± 0.06a | 6.75 ± 0.04a | 2.60 ± 0.02a | 0.00 ± 0.00b | 1.94 ± 0.01a | 1.23 ± 0.01b |
|       | MnFe <sub>2</sub> O <sub>4</sub> | 0.93 ± 0.01c | 1.20 ± 0.01c | 1.22 ± 0.02a | 0.52 ± 0.00a | 0.88 ± 0.01c | 0.80 ± 0.01b |
| KL103 | Control                          | 2.38 ± 0.05b | 1.77 ± 0.03b | 1.17 ± 0.00b | 0.47 ± 0.00a | 1.14 ± 0.00b | 0.00 ± 0.00c |
|       | Cn dots                          | 3.09 ± 0.02a | 5.47 ± 0.04a | 1.13 ± 0.01c | 0.33 ± 0.29a | 1.85 ± 0.03a | 1.32 ± 0.01a |
|       | MnFe <sub>2</sub> O <sub>4</sub> | 0.90 ± 0.01c | 1.00 ± 0.02b | 0.60 ± 0.00b | 0.52 ± 0.02a | 0.84 ± 0.01c | 0.81 ± 0.00b |
| KW7   | Control                          | 4.65 ± 0.06a | 0.00 ± 0.00c | 1.38 ± 0.01a | 0.00 ± 0.00b | 3.69 ± 0.01a | 0.73 ± 0.00c |
|       | Cn dots                          | 3.30 ± 0.02b | 3.46 ± 0.04a | 0.00 ± 0.00c | 0.00 ± 0.00b | 2.06 ± 0.00b | 1.05 ± 0.01a |
|       | MnFe <sub>2</sub> O <sub>4</sub> | 3.83 ± 0.01b | 0.00 ± 0.00c | 0.81 ± 0.00b | 0.00 ± 0.00b | 2.17 ± 0.01b | 0.72 ± 0.00a |
|       | Control                          | 4.52 ± 0.01a | 1.20 ± 0.01a | 1.27 ± 0.02a | 0.00 ± 0.00b | 4.06 ± 0.06a | 0.80 ± 0.10a |
|       | Cn dots                          | 3.61 ± 0.04c | 0.97 ± 0.01b | 0.62 ± 0.00c | 0.46 ± 0.00a | 1.47 ± 0.01c | 0.00 ± 0.00b |

Results are presented as the means ± standard deviation ( $n = 3$ ). Different lowercase letters within each phenolic acid result indicate statistically significant differences among applied treatments on each line at  $p \leq 0.05$ .

**Table S2.** Maize inbred lines and F1 hybrids developed in the Maize Experimental Station

| Entry No. | Inbred line | Parent for F1 varieties                                   |
|-----------|-------------|-----------------------------------------------------------|
| 1         | 11BS8016-7  | Gangwonchal 43 ♀                                          |
| 2         | 12BS5076-8  | Gangwonchal 43 ♂                                          |
| 3         | 12S8052     | Gangwonchal 34 ♂                                          |
| 4         | 14S8025     | Gangwonchal 58 ♂                                          |
| 5         | 15RS8039    | Gangwonchal 51 ♀                                          |
| 6         | 15RS8056    | Gangwonchal 51 ♂                                          |
| 7         | 15RS8002    | Gangwonchal 57 ♀                                          |
| 8         | 15S8021-3   | Gangwonchal 48 ♀                                          |
| 9         | 16CLP23     | Saekchalgyo 109 ♀                                         |
| 10        | 16CLP40     | Saekchalgyo 105 ♀                                         |
| 11        | 17CS5047    | Saekchalgyo 105 ♂                                         |
| 12        | 16S8068-9   | Gangwonchal 48 ♂                                          |
| 13        | 17CS8006    | Saekchalgyo 109 ♂                                         |
| 14        | 17CS8067    | Saekchalgyo 56 ♀                                          |
| 15        | 17YS6032    | Gangwonchal 60 ♀                                          |
| 16        | 17YS8003    | Gangwonchal 60 ♂                                          |
| 17        | GP3         | Oryun2ho ♂                                                |
| 18        | GP5         | Oryun2ho ♀                                                |
| 19        | HCW1        | Cheongchunchal ♀                                          |
| 20        | HCW2        | Cheongchunchal ♂                                          |
| 21        | HCW3        | Hongmichal ♀                                              |
| 22        | HCW4        | Hongmichal ♂                                              |
| 23        | HCW5        | Mihongchal ♂                                              |
| 24        | HF12        | Dreamok ♂                                                 |
| 25        | HF22        | Dreamok ♀                                                 |
| 26        | HW1         | Dumechal ♀                                                |
| 27        | HW10        | Heugjeom2ho ♀                                             |
| 28        | HW11        | Arichal ♂                                                 |
| 29        | HW12        | Gangwonchal 34 ♀, Arichal ♀, Jangsuchal ♀                 |
| 30        | HW15        | Jangsuchal ♂                                              |
| 31        | HW16        | Goldchal ♀                                                |
| 32        | HW17        | Goldchal ♂                                                |
| 33        | HW18        | Gangwonchal 57 ♂, Mihyeonchal ♀                           |
| 34        | HW19        | Mihyeonchal ♂, Bunongchal ♂                               |
| 35        | HW3         | Mibaek2ho ♂, Mibaekchal ♀, Saekchalgyo 56 ♂               |
| 36        | HW4         | Mibaekchal ♂                                              |
| 37        | HW7         | Miheugchal ♀, Heugjeom2ho ♂                               |
| 38        | HW8         | Miheugchal ♂                                              |
| 39        | HW9         | Gangwonchal 46 ♂, Mibaek2ho ♀, Mihongchal ♀, Bunongchal ♀ |
| 40        | KL103       | Heugjeomchal ♀                                            |
| 41        | KW7         | Dumechal ♂, Heugjeomchal ♂                                |
